# Supplementary material
Source: HighWire-hosted journal article supplement (https://bmjopengastro.bmj.com/highwire/filestream/2218/field_highwire_adjunct_files/0/bmjgast-2021-000601supp001_data_supplement.pdf)
Supplement: bmjgast-2021-000601supp001_data_supplement.pdf [file bmjgast-2021-000601supp001_data_supplement.pdf]

Supplemental Table 1: List of Search Terms Used to Identify Manuscripts for Inclusion into The Study

| <b>Database</b>       | <b>Search Terms</b>                                                                                                                                                                                                                                                                                                                                                                                                                                                  |
|-----------------------|----------------------------------------------------------------------------------------------------------------------------------------------------------------------------------------------------------------------------------------------------------------------------------------------------------------------------------------------------------------------------------------------------------------------------------------------------------------------|
| <b>Pubmed</b>         | ("Colonic Neoplasms"[Mesh] OR "Rectal Neoplasms"[Mesh] OR "Polyps"[Mesh] OR "Adenomatous Polyps"[Mesh] OR "Colorectal Neoplasms"[Mesh] OR "Colonic Neoplasms" or "Colonic Neoplasm" or "Rectal Neoplasms" or "Rectal Neoplasm" or "Adenomatous Polyps" or "Adenomatous Polyp" or "Colon Cancer" or "Rectal Cancer" or "Polyps" or "Polyp") AND ("Anti-Bacterial Agents"[Mesh] OR "Anti-Bacterial Agents" OR "Anti-Bacterial Agent" OR "Antibiotic" OR "Antibiotics") |
| <b>EMBASE</b>         | ("Colonic Neoplasms" OR "Colonic Neoplasm" OR "Rectal Neoplasms" or "Rectal Neoplasm" OR "adenomatous polyps" OR "adenomatous polyp" OR "Polyps" OR "Polyp" OR "Colorectal Neoplasms" OR "Colorectal Neoplasm") AND ("Anti-Bacterial Agent" OR "Antibiotics" OR "Antibiotic")                                                                                                                                                                                        |
| <b>Web of Science</b> | TS = (("Colonic Neoplasms" OR "Colonic Neoplasm" OR "Rectal Neoplasms" or "Rectal Neoplasm" OR "Colon Cancer" OR "Rectal Cancer" OR "Adenomatous Polyp" OR "Adenomatous Polyp" OR "Polyps" OR "Polyp") AND ("Antibacterial Agent" OR "Antibacterial Agents" OR "Antibiotics" OR "Antibiotic"))                                                                                                                                                                       |
